# Supplementary material for: Mitotic checkpoint gene expression is tuned by codon usage bias
Source: PubMed Central journal article supplement (PMC9340482; doi:10.15252/embj.2021107896), 2022-07-11
Supplement: EMBJ-41-e107896-s004.pdf [file EMBJ-41-e107896-s004.pdf]

## Appendix

### Mitotic checkpoint gene expression is tuned by coding sequences

Esposito, Weidemann, et al.

|                                                                                                                                                           |    |
|-----------------------------------------------------------------------------------------------------------------------------------------------------------|----|
| Figure S1. Image analysis using the Pomegranate pipeline to determine GFP intensities and noise .....                                                     | 2  |
| Figure S2. Additional data on Mad1, Mad2, and Mad3 protein concentrations and half-life .....                                                             | 3  |
| Figure S3. Codon optimality of <i>mad1</i> , <i>mad2</i> , and <i>mad3</i> before and after codon-optimization .....                                      | 4  |
| Figure S4. Additional data on Mad1-co-GFP protein half-life and function .....                                                                            | 6  |
| Figure S5. Sequences surrounding the <i>mad1</i> <sup>+</sup> coding region are insufficient for proper expression.....                                   | 8  |
| Figure S6. Assessing dimerization of Mad1 C-terminal fragments in yeast cell extract and in vitro translation.....                                        | 9  |
| Figure S7. CSC along Mad1 and Mad2 in <i>S. cerevisiae</i> , <i>S. pombe</i> , and <i>H. sapiens</i> and synonymous mutations<br>observed in cancer ..... | 10 |
| Table S1 - Yeast strains .....                                                                                                                            | 11 |
| Table S2 - sgRNA targeting sequences .....                                                                                                                | 13 |
| Table S3 - codon-optimized SAC gene sequences.....                                                                                                        | 14 |
| Table S4 - FISH probes.....                                                                                                                               | 15 |
| Table S5 - qPCR primers .....                                                                                                                             | 16 |
| Table S6 - Mad1 sequences for in vitro transcription and translation .....                                                                                | 17 |

# Figure S1

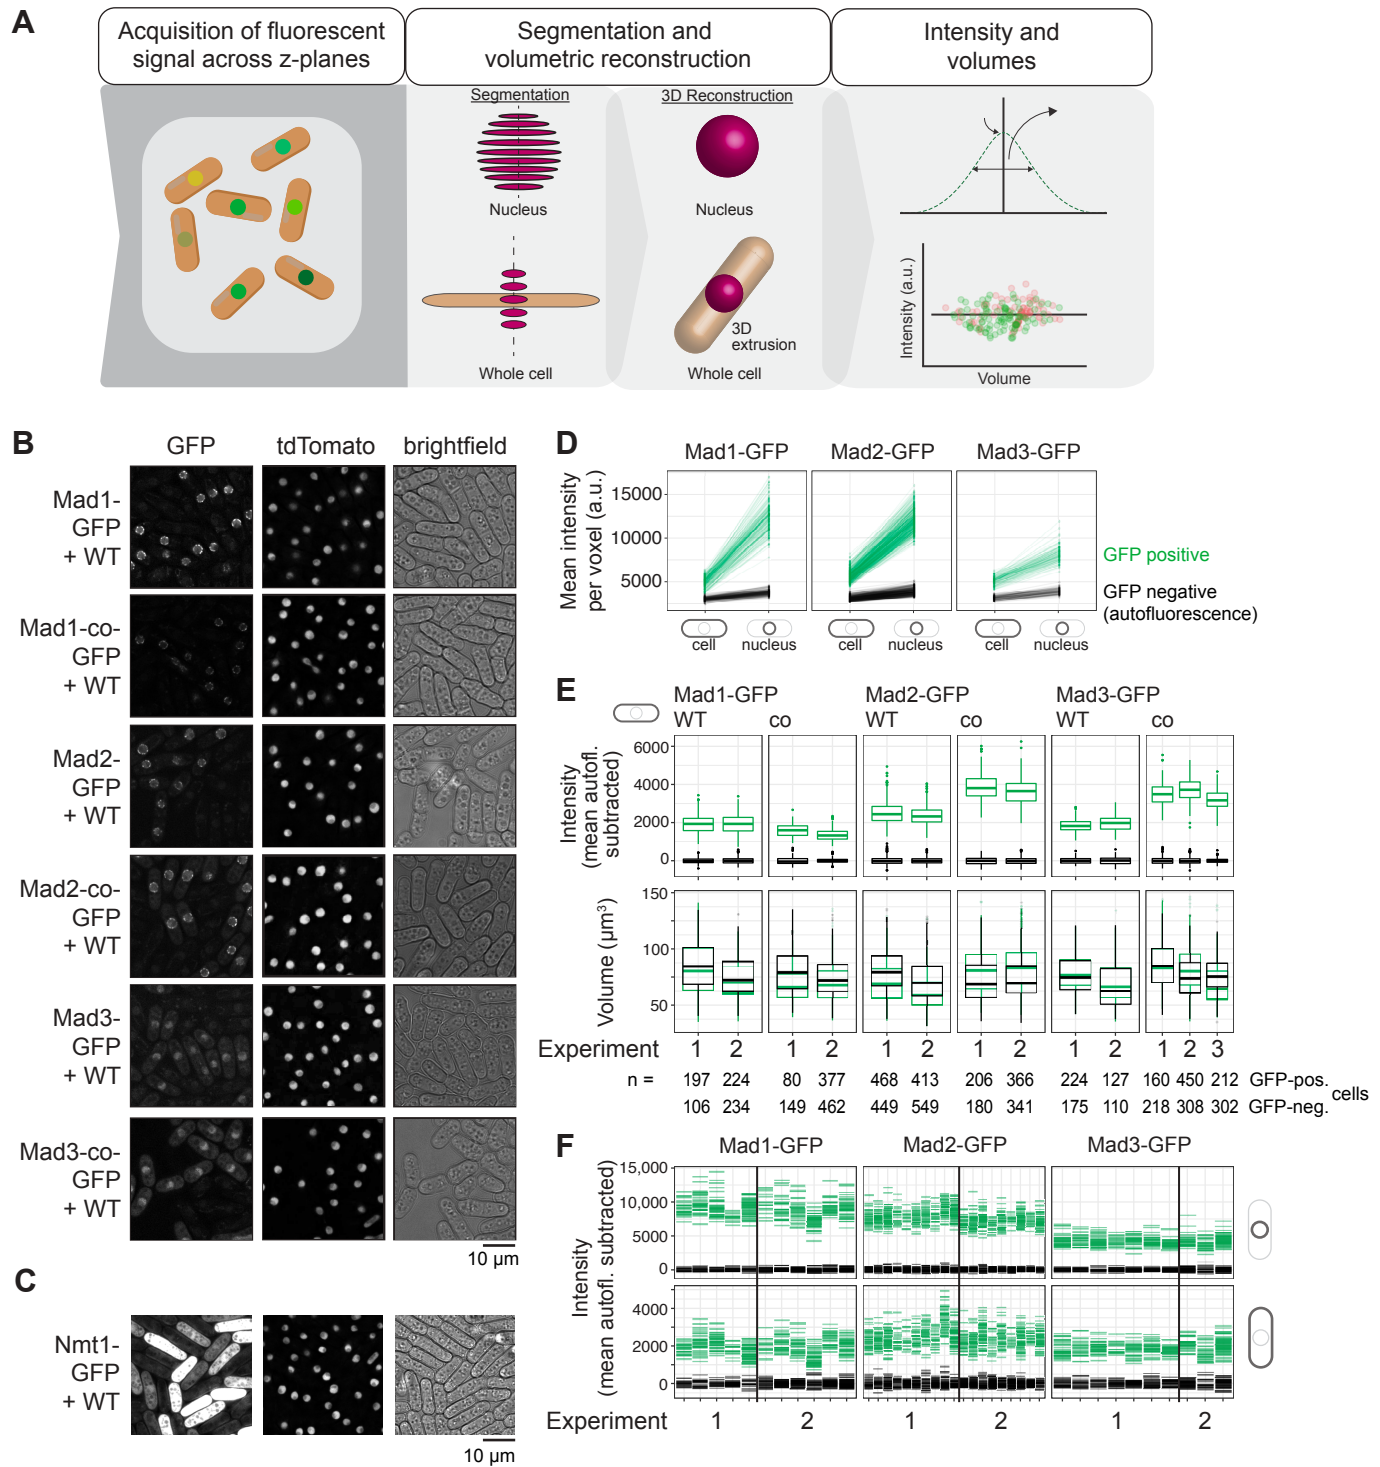

**Figure S1. Image analysis using the Pomegranate pipeline to determine GFP intensities and noise.**

(A) Schematic overview of the Pomegranate pipeline (Baybay *et al.*, 2020): cells are segmented in two dimensions (2D) based on the brightfield image, nuclei are segmented in three dimensions (3D) based on tdTomato-NLS signal. To collect signal from the entire cell, the most in-focus 2D cell segmentation is extended into 3D by spherical extrusion. Signals are averaged from across all z-sections to obtain cellular and nuclear intensities. (B, C) Example pictures from live-cell imaging. The strains to be quantified are mixed with wild-type cells (WT, not expressing GFP) to subtract autofluorescence. Cells are trapped in a microfluidics channel. (D) GFP-expressing (green) and GFP-negative wild-type cells (black) are separated based on their distinct intensities in the green channel (a.u. = arbitrary units). For checkpoint proteins, k-means clustering with  $k = 2$  was used. For Nmt1-GFP, the populations were split manually. (E) Volumes between GFP-positive (green) and GFP-negative (black) cells are similar, but intensities differ. For intensity, the mean signal intensity of the GFP-negative cells in each image was subtracted. (WT = wild-type coding sequence, co = codon-optimized coding sequence) (F) Fluorescence intensities of GFP-positive (green) and GFP-negative (black) cells in different images and experiments to demonstrate variability. Black vertical lines separate experiments on different days. Top: nuclear intensities; bottom: whole-cell intensities.

## Figure S2

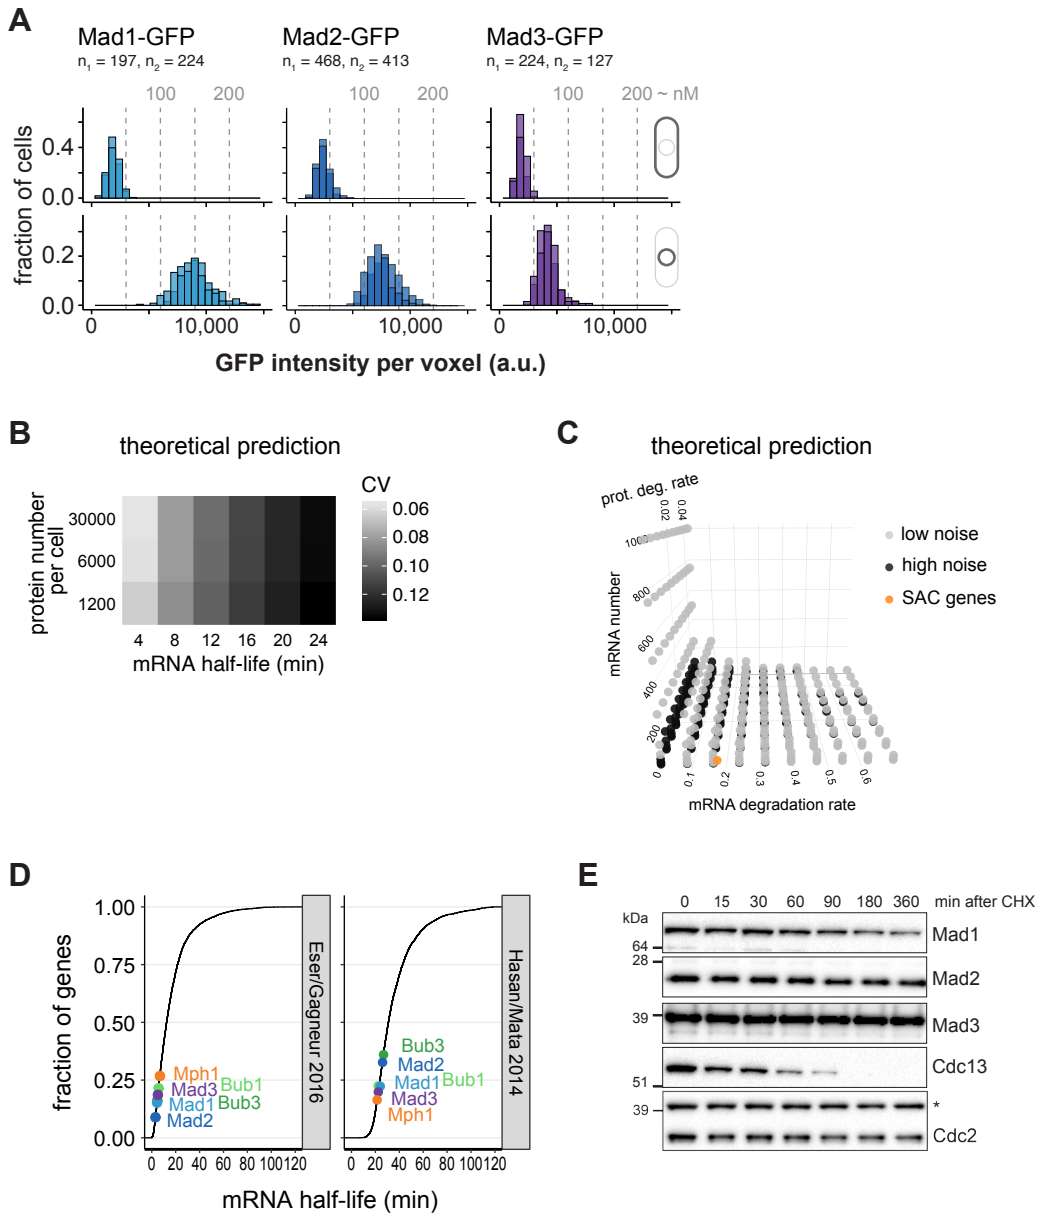

### Figure S2. Additional data on Mad1, Mad2, and Mad3 protein concentrations and half-life.

**(A)** Concentration of GFP measured by live-cell imaging in whole cells (top) or nuclei (bottom). Two replicate experiments are overlaid. Estimates for concentration in nM are derived from comparison to previous absolute quantification of a *mad3<sup>+</sup>-GFP<<kanR* strain and are very rough estimates only. **(B)** Theoretical prediction for the coefficient of variation ( $CV = \text{std} / \text{mean}$ ) of the protein number per cell, assuming different mRNA half-lives, using the same underlying model as in Figure 1B and C. Protein half-life was set to 6 hours and protein synthesis rate was adjusted to reach each specified mean on the y-axis. Synthesis rate for mRNA was adjusted to maintain a mean mRNA number per cell of 3.5. **(C)** Simulated protein noise for different mRNA numbers, mRNA degradation rates and protein degradation rates. Noise was labeled as low when it was similar or lower than that of SAC genes and high otherwise. The mRNA degradation rate was varied in a range corresponding to half-lives of 1–60 minutes. The protein degradation rate was varied in a range corresponding to half-lives of 15–600 minutes. Missing points (e.g. high mRNA numbers at high mRNA degradation rates) are not included, because they would require non-physiologically high transcription or translation rates. The position where SAC genes are found in this grid is marked in orange. **(D)** Cumulative distribution of the mRNA half-lives of protein-coding *S. pombe* genes, measured by Eser *et al.* (2016) or Hasan *et al.* (2014). Position of spindle assembly checkpoint genes marked in color. **(E)** Immunoblot of protein extracts harvested at the indicated times after translation shut-off by cycloheximide. One of the experiments quantified in Figure 2E. Asterisk indicates a cross-reaction of the anti-Cdc2 antibody.

**Figure S3**

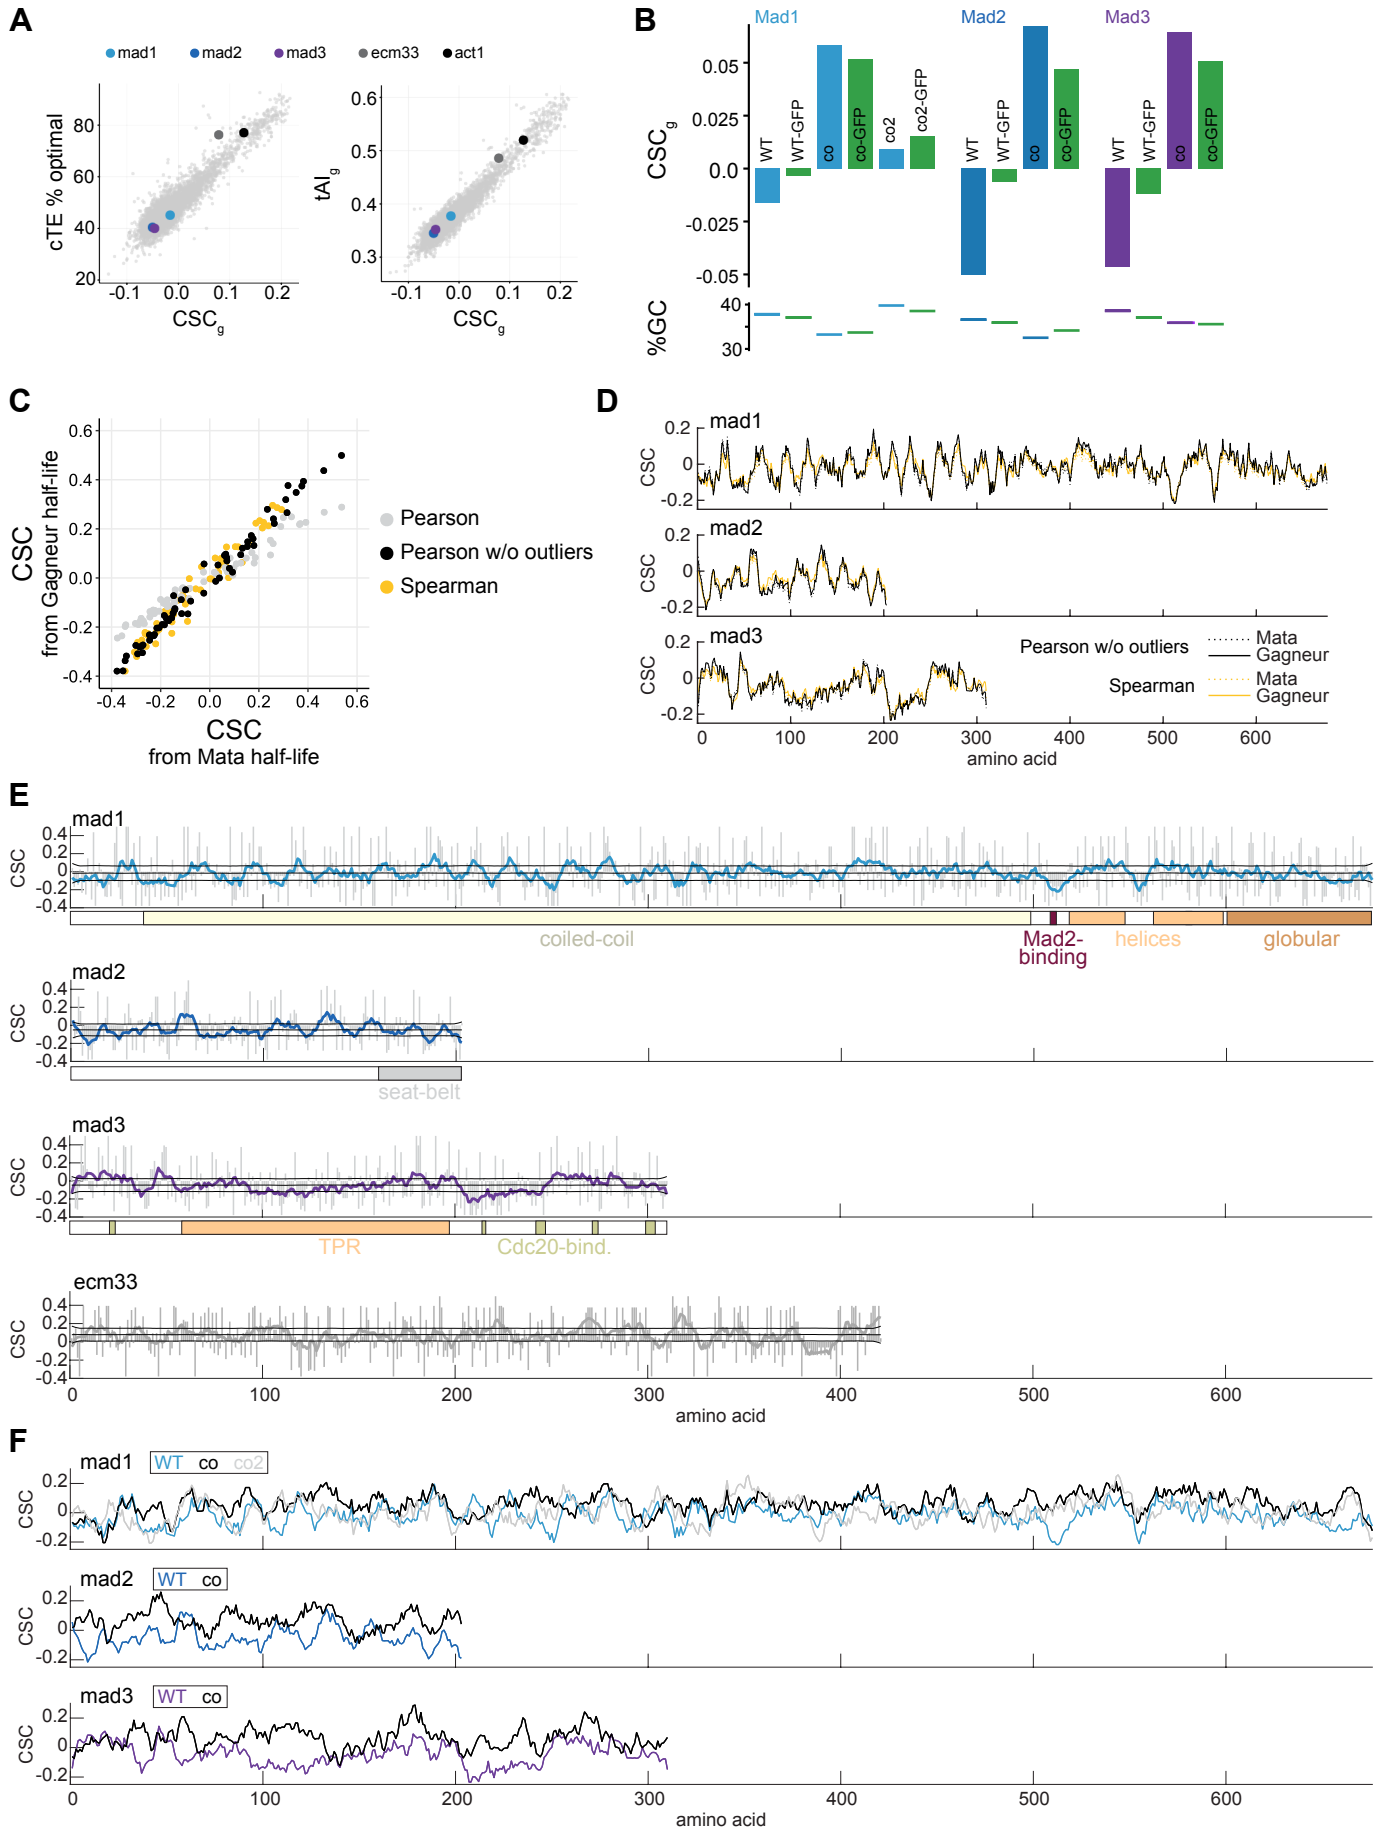

**Figure S3. Codon optimality of *mad1*, *mad2*, and *mad3* before and after codon-optimization.**

**(A)** Comparison between  $CSC_g$  and other measures of codon optimality across protein-coding *S. pombe* genes. Genes relevant in this study are highlighted. **(B)**  $CSC_g$  and GC content (%GC) for *mad1*, *mad2* and *mad3* before and after codon-optimization, and without or with taking the GFP tag into account. **(C)** CSC of the 61 amino acid-coding codons derived using mRNA half-life data from either the Mata group (Hasan *et al.*, 2014) or the Gagneur group (Eser *et al.*, 2016), and determined using different correlation methods (color), as explained in the methods section. **(D)** Moving average of the CSC across 9 codons along the length of each SAC gene, using codon CSC values derived from different datasets or with different correlation methods as in (C). **(E)** CSC value of each codon (grey bars) and moving average across 9 codons (colored line) along the length of each gene. For the SAC genes, functional and structural motifs are shown at the bottom. The middle black line represents the mean CSC across the gene ( $=CSC_g$ ). The black lines above and below were obtained by randomly permuting the CSC values along the gene 10,000-times and determining the moving average across 9 codons (as for the original data). Shown is  $\pm 1$  standard deviation of this randomized data. **(F)** Moving average of the CSC across 9 codons along the length of each SAC gene for both the wild-type and codon-optimized versions.



**Figure S4. Additional data on Mad1-co-GFP protein half-life and function.**

**(A)** Immunoblot of protein extracts at the indicated times after translation shut-off by cycloheximide. One of the experiments quantified in (B). The first four lanes contain a 1:1 dilution series of the 0 min sample. Mad1-GFP and Mad1-co-GFP were probed with anti-GFP. Cdc2 serves as control. **(B)** Top: Protein abundances after translation shut-off with cycloheximide (n = 3 experiments for wild-type (WT) cells, error bars = std; n = 2 experiments for *mad1-co* expressing cells). Lines indicate fit to a one-phase exponential decay. Extracts were probed for Mad1 and Cdc2. A representative immunoblot is shown in (A). Bottom: Same data, but now including one experiment for Mad1 WT cells, where levels for both Mad1 and Cdc2 at time points 15 min to 180 min were higher than at the 0 min time point. **(C)** Anti-GFP immunoprecipitation (IP) of Mad1-GFP (WT) and Mad1-co-GFP. Input, IP, and supernatant after IP (sup) were probed with antibodies against Mad1, Mad2 and tubulin. **(D)** The accumulation of Mad1-GFP at kinetochores in early mitosis was quantified in cells expressing the cold-sensitive tubulin mutant *nda3-KM311* and *plo1<sup>+</sup>-mCherry*, imaged at the restrictive temperature of 16°C. Mad1-GFP signals adjacent to spindle pole bodies (marked with Plo1-mCherry) were interpreted as kinetochore localization (a.u. = arbitrary units; error bars = s.d.; n = 13 and 12 cells). One out of two experiments is shown. **(E)** Cells expressing the cold-sensitive tubulin mutant *nda3-KM311*, *plo1<sup>+</sup>-mCherry*, and the indicated versions of *mad1* were analyzed by live-cell imaging at the restrictive temperature of 16°C, similar to the experiment in (D). The time that each cell spent in prometaphase was determined by localization of Plo1 to spindle pole bodies (circle). Cells for which mitosis time could be measured precisely are indicated by open, blue circles, cells that had not yet exited mitosis when filming stopped by open, blue triangles, and cells that died during mitosis by filled, gray circles. n = 29, 32 and 53 cells. **(F)** Additional data for the experiment in Fig 6F. Live-cell imaging of *alp7Δ* cells expressing wild-type (WT) or codon-optimized (*co*) *mad1*-GFP as well as *plo1*-tdTomato. Maximum GFP and tdTomato signals in cells were quantified in two experiments (using different strains with identical genotype). Number of cells is shown at the top. Maximum Mad1-GFP signal in the cell reports on Mad1 kinetochore localization (and hence spindle assembly checkpoint activation); maximum Plo1-tdTomato signal in the cell reports on Plo1 spindle pole body localization (and hence on whether the cell is in mitosis or not). Entry into mitosis was judged by an increase in maximal Plo1 signal, and curves were aligned to that time point. Left and middle panels show single cells; cells that had not exited mitosis by the end of the movie are shown in red, all others in gray. Panel on the right shows the average across all cells. Each experiment had two rounds of imaging, which are shown separately. When values were not available for a given time point for a given cell (e.g. because the movie had ended after the cell exited mitosis), the minimum signal observed for this cell was used in the averaging. Kymographs of representative cells are shown at the bottom. The cell on the left silences the spindle assembly checkpoint and exits mitosis; the cell on the right maintains spindle assembly checkpoint activation until the end of the movie.

**Figure S5**

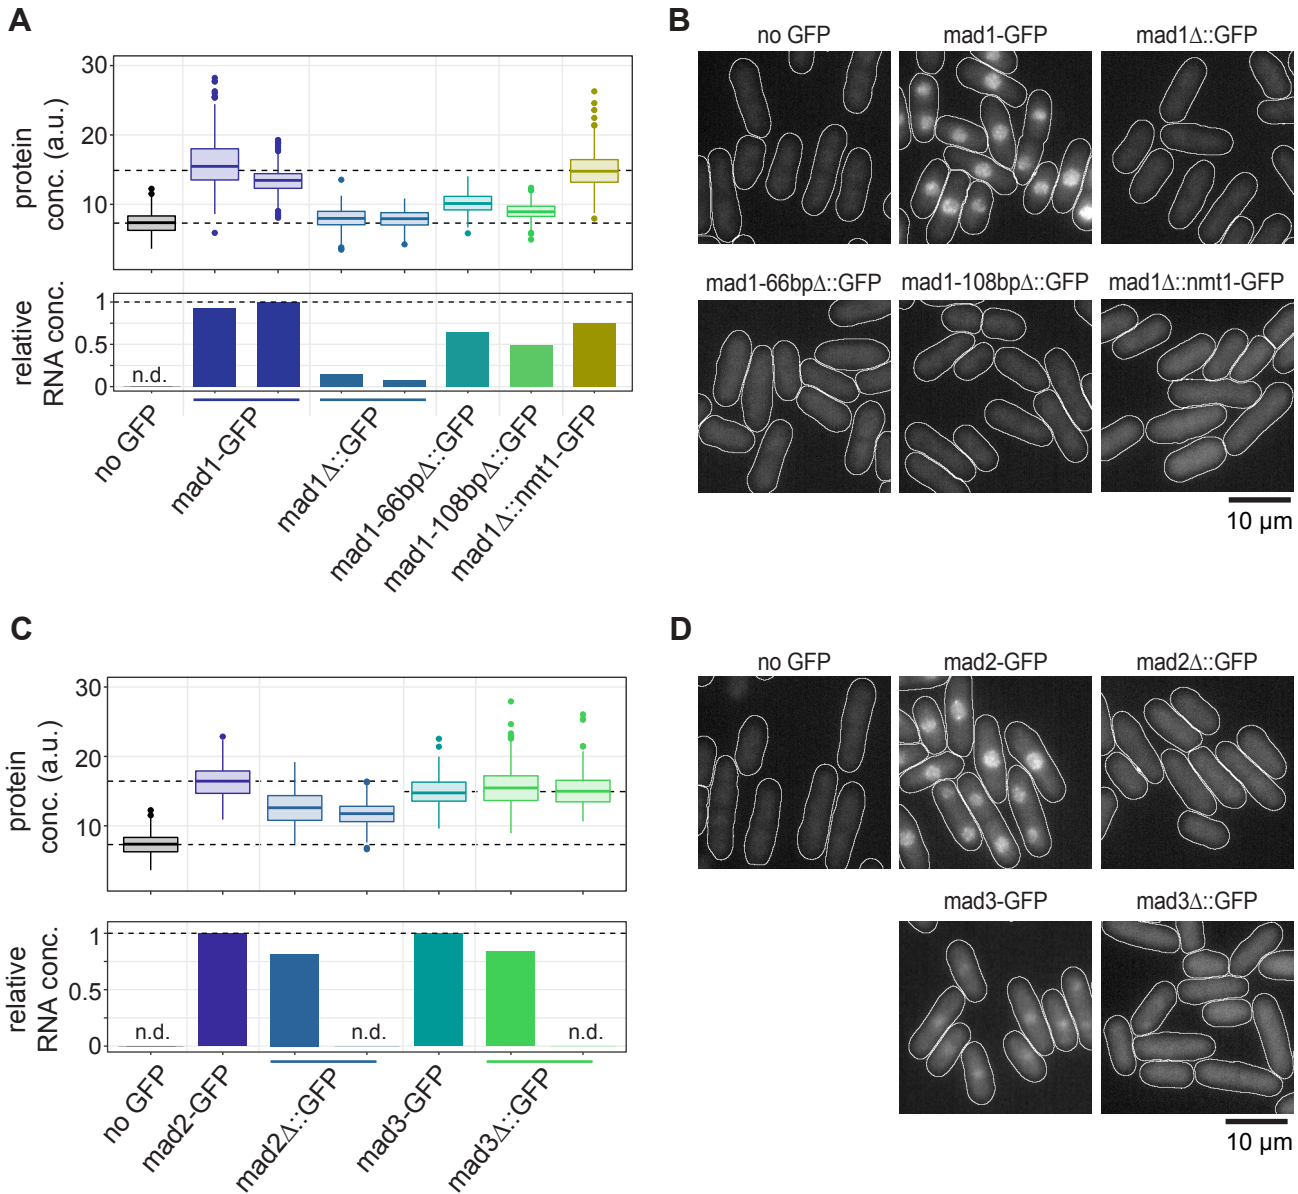

**Figure S5. Sequences surrounding the *mad1*<sup>+</sup> coding region are insufficient for proper expression.**

**(A)** The indicated strains were tested for GFP expression by qPCR (bottom panel) and by live-cell microscopy (top panel; a.u. = arbitrary units). *Mad1* was either fused to GFP (*mad1-GFP*), or the coding sequence of *mad1*<sup>+</sup> was replaced with GFP (*mad1Δ::GFP*), replaced with the 5' region of *mad1*<sup>+</sup> (66 bp or 108 bp) followed by GFP, or replaced with *nmt1*<sup>+</sup>-GFP (*mad1Δ::nmt1-GFP*). A strain not expressing any GFP was used as reference. Boxplots show median and interquartile range (IQR); lines extend to values no further than 1.5 times the IQR from the first and third quartile, respectively. For microscopy: no GFP: n = 634 cells; *mad1-GFP*: n = 525 and 391; *mad1Δ::GFP*: n = 497 and 360; *mad1-66bpΔ::GFP*: n = 293; *mad1-108bpΔ::GFP*: n = 173; *mad1Δ::nmt1-GFP*: n = 419 cells. **(B)** Representative live-cell microscopy images from the experiment in (A). Cell shapes are outlined in white. **(C)** Similar to (A), but for strains in which *mad2*<sup>+</sup> or *mad3*<sup>+</sup> were either fused to GFP (*mad2-GFP*, *mad3-GFP*), or the coding sequence was replaced with GFP (*mad2Δ::GFP*, *mad3Δ::GFP*). The strain not expressing any GFP is the same as in (A). For microscopy: no GFP: n = 634 (same strain and experiment as in A); *mad2-GFP*: n = 333; *mad2Δ::GFP*: n = 299 and 358; *mad3-GFP*: n = 355; *mad3Δ::GFP*: n = 608 and 297 cells. **(D)** Representative live-cell microscopy images from the experiment in (C). Cell shapes are outlined in white.



## Figure S6

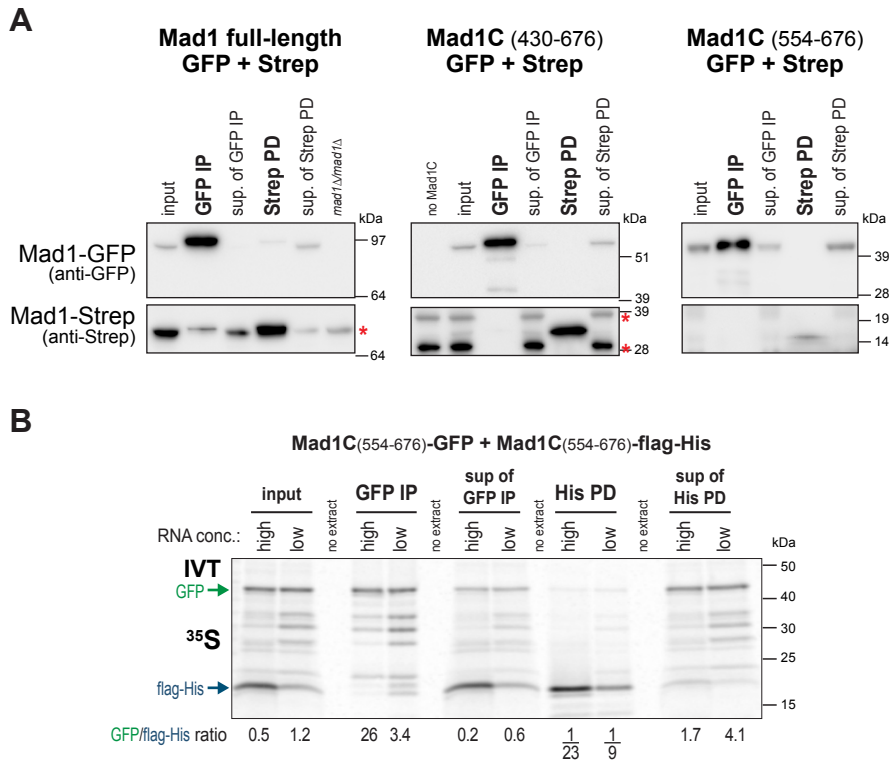

### Figure S6. Assessing dimerization of Mad1 C-terminal fragments in yeast cell extract and *in vitro* translation.

**(A)** Diploid strains, expressing one copy of GFP-tagged and one copy of Strep-tagged Mad1. Full-length Mad1 (left panel) is expressed from the endogenous locus. The C-terminal fragments (middle and right panel) are expressed under the *mad3*<sup>+</sup> promoter from the exogenous *leu1* locus; in this case, the endogenous copy of *mad1*<sup>+</sup> was deleted. GFP immunoprecipitation (IP) or Strep pull-down (PD) from the same extract are shown, probed with anti-GFP and anti-Strep; input is 3 % of extract used for IP/PD, sup = supernatant. Red asterisks indicate prominent cross-reactions of the anti-Strep antibody, one of which overlaps with full-length Mad1-Strep. **(B)** Mad1 C-terminal fragments tagged with either GFP or flag-His were *in vitro* transcribed, mixed, and translated in the presence of <sup>35</sup>S-labelled Methionine and Cysteine. The *in vitro* translation was split and subjected to GFP immunoprecipitation (IP) or His pull-down (PD). Input (8 % of extract used for IP/PD) and supernatant (sup) samples after IP/PD are loaded as well. Shown is the autoradiograph after SDS-PAGE. The higher RNA conc. is 40 ng/μL *mad1C*-GFP and 30 ng/μL *mad1C*-flag-His, the lower RNA conc. is 1.14 ng/μL *mad1C*-GFP and 0.86 ng/μL *mad1C*-flag-His. Radioactive bands corresponding to Mad1C-GFP and Mad1-flag-His were quantified and the ratio is given under each lane. For the His PD, the ratio is given as a fraction. One out of two experiments with similar results.

**Figure S7**

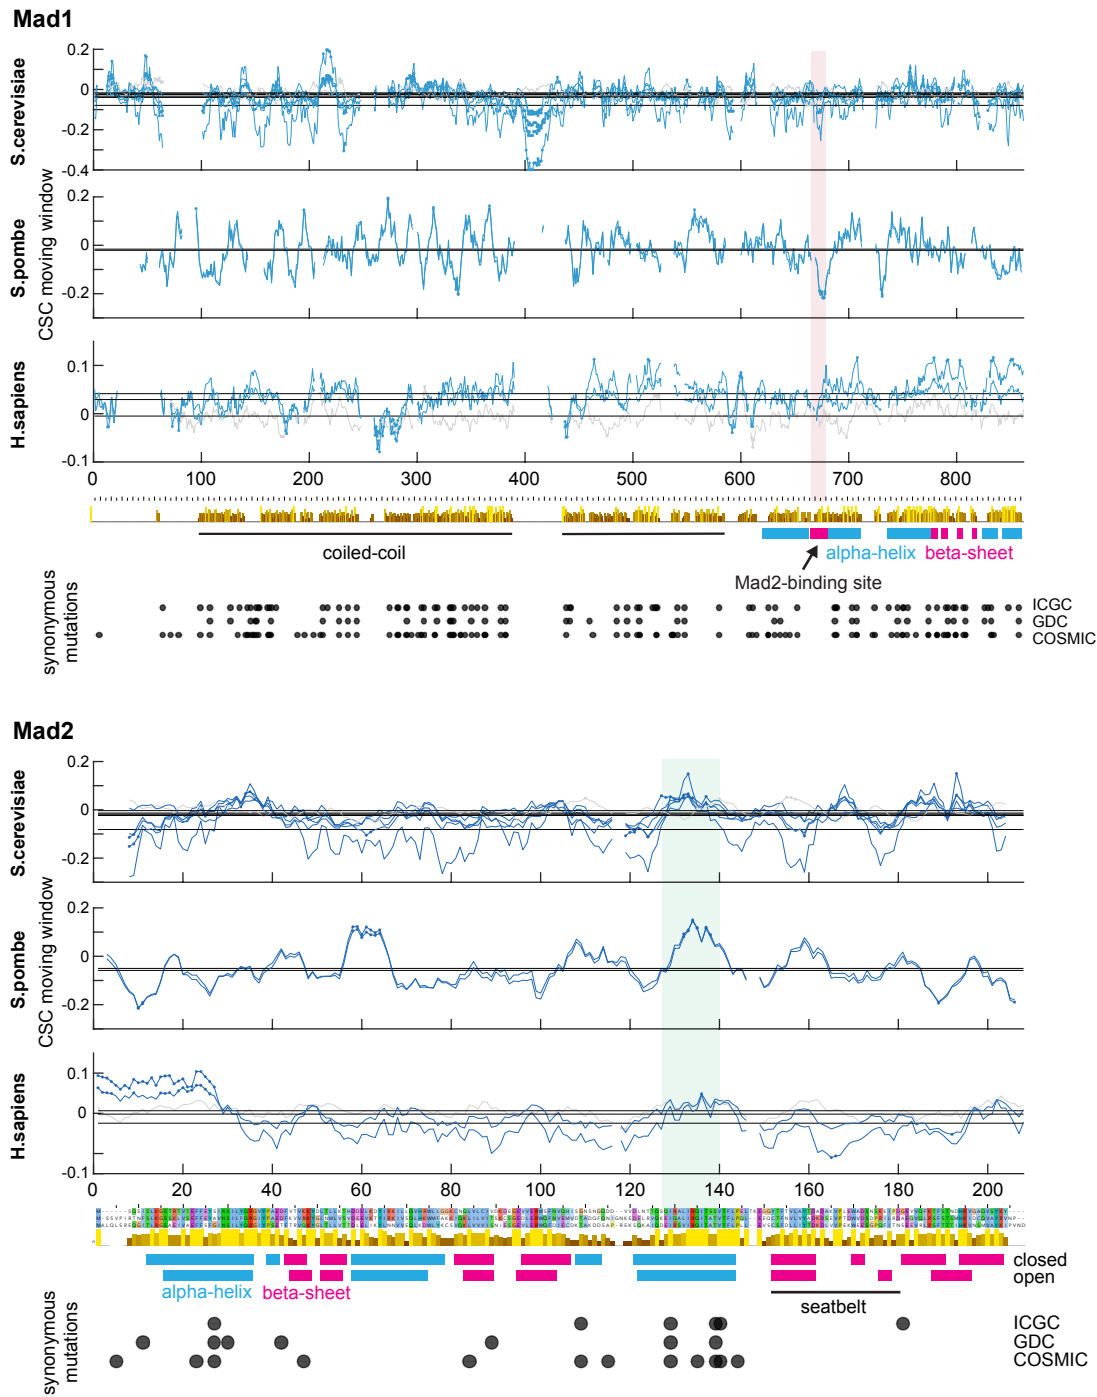

**Figure S7. CSC along Mad1 and Mad2 in *S. cerevisiae*, *S. pombe*, and *H. sapiens* and synonymous mutations observed in cancer.**

Mad1 and Mad2 were aligned using MAFFT. Yellow/brown bars beneath each panel indicate conservation. Blue and light gray lines show the moving CSC average across 9 codons. CSC values were derived from different mRNA half-life datasets, as explained in the Methods section under 'Codon usage bias calculations', resulting in the multiple lines for each species. Datasets that were based on less data, or showed a different tendency from others are shown in light gray (see Methods for details). Filled circles in the curves indicate positions where the value deviates by more than two standard deviations from the mean for this particular dataset and gene. The thin horizontal lines indicate the mean of CSC values across the gene for each dataset. Secondary structure elements come from solved structures, whose protein data bank (PDB) identifiers are given in brackets. Red-shaded region: Mad2-binding site in Mad1 with markedly low CSC values in *S. pombe* and in one of the *S. cerevisiae* datasets. Green-shaded region: Conserved region in Mad2 with commonly high CSC values in these three organisms. Grey dots at the bottom indicate the position of synonymous mutations found in human cancer databases. In the ICGC and COSMIC data, synonymous mutations are enriched in the Mad2 region marked in green ( $p < 0.005$  by chi-square test).

Table S1 - Yeast strains

| Strain Number                                                                                                     | Mating type | Genotype                                                                          |
|-------------------------------------------------------------------------------------------------------------------|-------------|-----------------------------------------------------------------------------------|
| <b>Figure 1B, 2A; S1, S2A (protein concentrations and noise by live-cell imaging)</b>                             |             |                                                                                   |
| SW184                                                                                                             | <i>h-</i>   | <i>leu1 Z&lt;&lt;natR&lt;&lt;Padh31-tetR-tdTomato</i>                             |
| SW178                                                                                                             | <i>h+</i>   | <i>mad1+-ymEGFP Z&lt;&lt;natR&lt;&lt;Padh31-tetR-tdTomato</i>                     |
| SW180                                                                                                             | <i>h+</i>   | <i>mad2+-ymEGFP Z&lt;&lt;natR&lt;&lt;Padh31-tetR-tdTomato</i>                     |
| SW182                                                                                                             | <i>h+</i>   | <i>mad3+-ymEGFP Z&lt;&lt;natR&lt;&lt;Padh31-tetR-tdTomato</i>                     |
| SW200                                                                                                             | <i>h?</i>   | <i>nmf1+-ymEGFP&lt;&lt;kanMX6 Z&lt;&lt;natR&lt;&lt;Padh31-tetR-tdTomato</i>       |
| <b>Figure 1C,D; EV1C (WT mRNA numbers by smFISH)</b>                                                              |             |                                                                                   |
| SW206                                                                                                             | <i>h+</i>   | <i>mad1+-ymEGFP</i>                                                               |
| SW642                                                                                                             | <i>h+</i>   | <i>mad1+-ymEGFP</i>                                                               |
| SW130                                                                                                             | <i>h+</i>   | <i>mad2+-ymEGFP</i>                                                               |
| SW132                                                                                                             | <i>h+</i>   | <i>mad3+-ymEGFP</i>                                                               |
| SW132'                                                                                                            | <i>h+</i>   | <i>mad3+-ymEGFP</i>                                                               |
| <b>Figure 1E; EV1E (mRNA numbers by smFISH, tagged vs. untagged)</b>                                              |             |                                                                                   |
| SW642                                                                                                             | <i>h+</i>   | <i>mad1+-ymEGFP</i>                                                               |
| SW130                                                                                                             | <i>h+</i>   | <i>mad2+-ymEGFP</i>                                                               |
| JY001                                                                                                             | <i>h-</i>   | wild type                                                                         |
| <b>Figure 1F; EV1D (test of mRNA co-localization and comparison of endogenous and GFP FISH probes)</b>            |             |                                                                                   |
| SW642                                                                                                             | <i>h+</i>   | <i>mad1+-ymEGFP</i>                                                               |
| SW130                                                                                                             | <i>h+</i>   | <i>mad2+-ymEGFP</i>                                                               |
| <b>Figure 2D (mRNA half-life)</b>                                                                                 |             |                                                                                   |
| JY743                                                                                                             | <i>h-</i>   | <i>leu1 ura4-D18</i>                                                              |
| ST932                                                                                                             |             | <i>S. cerevisiae MET17pr-Fluc::lys2Δ (AMV54, Buchler lab)</i>                     |
| <b>Figure 2E; S2E (protein half-life)</b>                                                                         |             |                                                                                   |
| JY001                                                                                                             | <i>h-</i>   | wild type                                                                         |
| SU228                                                                                                             | <i>h+</i>   | <i>bub1+-ymEGFP</i>                                                               |
| SL221                                                                                                             | <i>h-</i>   | <i>leu1 ade6-M216 cut1+-GFP&lt;&lt;kanR</i>                                       |
| <b>Figure 3D; EV2B, EV3 (mad2 and mad3 mRNA numbers by smFISH after codon-optimization and/or ste13 deletion)</b> |             |                                                                                   |
| SW130                                                                                                             | <i>h+</i>   | <i>mad2+-ymEGFP</i>                                                               |
| SW131                                                                                                             | <i>h+</i>   | <i>mad2-codonOpt-ymEGFP</i>                                                       |
| SW132                                                                                                             | <i>h+</i>   | <i>mad3+-ymEGFP</i>                                                               |
| SW132'                                                                                                            | <i>h+</i>   | <i>mad3+-ymEGFP</i>                                                               |
| SW133                                                                                                             | <i>h+</i>   | <i>mad3-codonOpt-ymEGFP</i>                                                       |
| SW153                                                                                                             | <i>h+</i>   | <i>mad2+-ymEGFP ste13Δ::kanMX6</i>                                                |
| SW153'                                                                                                            | <i>h+</i>   | <i>mad2+-ymEGFP ste13Δ::kanMX6</i>                                                |
| SW154                                                                                                             | <i>h+</i>   | <i>mad3+-ymEGFP ste13Δ::kanMX6</i>                                                |
| SW154'                                                                                                            | <i>h+</i>   | <i>mad3+-ymEGFP ste13Δ::kanMX6</i>                                                |
| SW157                                                                                                             | <i>h+</i>   | <i>mad2+-ymEGFP ste13Δ::kanMX6</i>                                                |
| SW158                                                                                                             | <i>h+</i>   | <i>mad3+-ymEGFP ste13Δ::kanMX6</i>                                                |
| SW193                                                                                                             | <i>h+</i>   | <i>mad2-codonOpt-ymEGFP ste13Δ::kanMX6</i>                                        |
| SW193'                                                                                                            | <i>h+</i>   | <i>mad2-codonOpt-ymEGFP ste13Δ::kanMX6</i>                                        |
| SW194                                                                                                             | <i>h+</i>   | <i>mad3-codonOpt-ymEGFP ste13Δ::kanMX6</i>                                        |
| SW194'                                                                                                            | <i>h+</i>   | <i>mad3-codonOpt-ymEGFP ste13Δ::kanMX6</i>                                        |
| <b>Figure 3E, 5D; EV2C (mad2 and mad3 mRNA half-life after ste13 deletion)</b>                                    |             |                                                                                   |
| JY743                                                                                                             | <i>h-</i>   | <i>leu1 ura4-D18</i>                                                              |
| ST932                                                                                                             |             | <i>S. cerevisiae MET17pr-Fluc::lys2Δ (AMV54, Buchler lab)</i>                     |
| SW239                                                                                                             | <i>h-</i>   | <i>leu1 ura4-D18 ste13Δ::kanMX6</i>                                               |
| <b>Figure 4A,C (Mad2 and Mad3 protein levels after codon-optimization by immunoblotting)</b>                      |             |                                                                                   |
| SU257                                                                                                             | <i>h+</i>   | <i>leu1+&lt;&lt; Park1-mCherry cut11+-mCherry&lt;&lt;hph mad2+-ymEGFP</i>         |
| SU263                                                                                                             | <i>h+</i>   | <i>leu1+&lt;&lt; Park1-mCherry cut11+-mCherry&lt;&lt;hph mad2-codonOpt-ymEGFP</i> |
| SU131                                                                                                             | <i>h-</i>   | <i>leu1 ura4-D18 mad2+-ymEGFP</i>                                                 |
| SU128                                                                                                             | <i>h-</i>   | <i>leu1 ura4-D18 mad2-codonOpt-ymEGFP</i>                                         |
| SU294                                                                                                             | <i>h+</i>   | <i>leu1+&lt;&lt; Park1-mCherry cut11+-mCherry&lt;&lt;hph mad3+-ymEGFP</i>         |
| SW120                                                                                                             | <i>h+</i>   | <i>leu1+&lt;&lt; Park1-mCherry cut11+-mCherry&lt;&lt;hph mad3-codonOpt-ymEGFP</i> |
| SW121                                                                                                             | <i>h+</i>   | <i>leu1+&lt;&lt; Park1-mCherry cut11+-mCherry&lt;&lt;hph mad3-codonOpt-ymEGFP</i> |
| <b>Figure 4B,C (Mad2 and Mad3 protein levels after ste13 deletion by immunoblotting)</b>                          |             |                                                                                   |
| JY001                                                                                                             | <i>h-</i>   | wild type                                                                         |
| JY002                                                                                                             | <i>h+</i>   | wild type                                                                         |
| SW148                                                                                                             | <i>h+</i>   | <i>ste13Δ::kanMX6</i>                                                             |
| <b>Figure 4D,E; S1, S2A (Mad2 and Mad3 protein levels after codon-optimization by live-cell imaging)</b>          |             |                                                                                   |
| SW184                                                                                                             | <i>h-</i>   | <i>leu1 Z&lt;&lt;natR&lt;&lt;Padh31-tetR-tdTomato</i>                             |
| SW180                                                                                                             | <i>h+</i>   | <i>mad2+-ymEGFP Z&lt;&lt;natR&lt;&lt;Padh31-tetR-tdTomato</i>                     |
| SW181                                                                                                             | <i>h+</i>   | <i>mad2-codonOpt-ymEGFP Z&lt;&lt;natR&lt;&lt;Padh31-tetR-tdTomato</i>             |
| SW182                                                                                                             | <i>h+</i>   | <i>mad3+-ymEGFP Z&lt;&lt;natR&lt;&lt;Padh31-tetR-tdTomato</i>                     |
| SW183                                                                                                             | <i>h+</i>   | <i>mad3-codonOpt-ymEGFP Z&lt;&lt;natR&lt;&lt;Padh31-tetR-tdTomato</i>             |
| <b>Figure 5B; EV4A,B, EV5A (mad1 mRNA numbers by smFISH after codon-optimization and/or ste13 deletion)</b>       |             |                                                                                   |
| SW206                                                                                                             | <i>h+</i>   | <i>mad1+-ymEGFP</i>                                                               |
| SW642                                                                                                             | <i>h+</i>   | <i>mad1+-ymEGFP</i>                                                               |
| SW129                                                                                                             | <i>h+</i>   | <i>mad1+-codonOpt-ymEGFP</i>                                                      |
| SW152                                                                                                             | <i>h+</i>   | <i>mad1+-ymEGFP ste13Δ::kanMX6</i>                                                |
| SW156                                                                                                             | <i>h+</i>   | <i>mad1+-ymEGFP ste13Δ::kanMX6</i>                                                |
| SW192                                                                                                             | <i>h+</i>   | <i>mad1-codonOpt-ymEGFP ste13Δ::kanMX6</i>                                        |
| SW248                                                                                                             | <i>h+</i>   | <i>mad1-codonOpt-ymEGFP ste13Δ::kanMX6</i>                                        |
| SW618                                                                                                             | <i>h+</i>   | <i>mad1+-codonOpt2-ymEGFP</i>                                                     |
| SW618'                                                                                                            | <i>h+</i>   | <i>mad1+-codonOpt2-ymEGFP</i>                                                     |
| <b>Figure 5C,D; EV4D,E (mad1, ecm33, and act1 mRNA half-life after ste13 deletion)</b>                            |             |                                                                                   |
| JY743                                                                                                             | <i>h-</i>   | <i>leu1 ura4-D18</i>                                                              |
| ST932                                                                                                             |             | <i>S. cerevisiae MET17pr-Fluc::lys2Δ (AMV54, Buchler lab)</i>                     |
| SW239                                                                                                             | <i>h-</i>   | <i>leu1 ura4-D18 ste13Δ::kanMX6</i>                                               |
| <b>Figure 6A,C (Mad1 protein levels after codon-optimization by immunoblotting)</b>                               |             |                                                                                   |
| SW106                                                                                                             | <i>h+</i>   | <i>leu1+&lt;&lt;Park1-mCherry cut11+-mCherry&lt;&lt;hph mad1+-ymEGFP</i>          |
| SU282                                                                                                             | <i>h+</i>   | <i>leu1+&lt;&lt;Park1-mCherry cut11+-mCherry&lt;&lt;hph mad1-codonOpt-ymEGFP</i>  |
| SU499                                                                                                             | <i>h-</i>   | <i>leu1 ura4-D18 mad1+-ymEGFP</i>                                                 |

SU136 *h- ura4-D18 mad1+codonOpt-ymEGFP*

**Figure 6B,C (Mad1 protein levels after ste13 deletion by immunoblotting)**

JY001 *h- wild type*  
 JY002 *h+ wild type*  
 SW148 *h+ ste13Δ::kanMX6*

**Figure 6D,E; S1, S2A (Mad1 protein levels after codon-optimization by live-cell imaging)**

SW184 *h- leu1 Z<<natR<<Padh31-tetR-tdTomato*  
 SW178 *h+ mad1+-ymEGFP Z<<natR<<Padh31-tetR-tdTomato*  
 SW179 *h+ mad1-codonOpt-ymEGFP Z<<natR<<Padh31-tetR-tdTomato*

**Figure 6F; S4F (Spindle assembly checkpoint-mediated mitotic delay in cells expressing wild-type or codon-optimized Mad1)**

SX073 *h? alp7Δ::hygR plo1+-tdTomato<<kanR mad1+-ymEGFP*  
 SX075 *h? alp7Δ::hygR plo1+-tdTomato<<kanR mad1-codonOpt-ymEGFP*  
 SX074 *h? alp7Δ::hygR plo1+-tdTomato<<kanR mad1+-ymEGFP*  
 SX076 *h? alp7Δ::hygR plo1+-tdTomato<<kanR mad1-codonOpt-ymEGFP*

**Figure 7A (Test for Mad1 co-translational assembly in haploid strain with tagged and untagged copies of mad1)**

SU164 *h+ leu1<<110nt-mad1+-ymEGFP-164nt*

**Figure 7B; EV6B (Test for Mad1 co-translational assembly in diploid strain with two differently tagged copies of mad1)**

SW623 *h+/h- leu1/leu1 ade6-M210/ade6-M216 ura4+/ura4-D18 mad1+-TEV-Strep2/mad1+-ymEGFP*

**Figure 7E; EV6D (mad1 mRNA dimerization experiment)**

JY265 *h- leu1*  
 SX411 *h- leu1<<110nt-mad1+-ymEGFP-164nt*  
 SX413 *h- leu1<<110nt-mad1+-ymEGFP-164nt mad1Δ::ura4+*  
 SW176 *h+ mad1+-ymEGFP mad3+-ymEGFP*

**Figure 7F (mad1 mRNA dimerization experiment)**

SW176 *h+ mad1+-ymEGFP mad3+-ymEGFP*

**Figure EV1A (Immunoblot of strains traditionally tagged or tagged by scar-free genome editing)**

SW206 *h+ mad1+-ymEGFP*  
 SK578 *h+ leu1 mad1+-GFP<<kanR cut11+-mCherry<<hph*  
 SW130 *h+ mad2+-ymEGFP*  
 SK580 *h+ mad2+-GFP<<kanR cut11+-mCherry<<hph*  
 SW132 *h+ mad3+-ymEGFP*  
 SK581 *h+ mad3+-GFP<<kanR cut11+-mCherry<<hph*

**Figure EV1B (Growth assay of strains with tagged mad1, mad2 and mad3, and ste13 deletion strain)**

SW206 *h+ mad1+-ymEGFP*  
 SW129 *h+ mad1-codonOpt-ymEGFP*  
 SW148 *h+ ste13Δ::kanMX6*  
 JY001 *h- wild type*  
 PV273 *h+ leu1 ade6-M216 nda3-KM311*  
 ST042' *h- leu1 ura4-D18 mad1Δ::ura4+*  
 SW130 *h+ mad2+-ymEGFP*  
 SW131 *h+ mad2-codonOpt-ymEGFP*  
 SW132 *h+ mad3+-ymEGFP*  
 SW133 *h+ mad3-codonOpt-ymEGFP*

**Figure EV2A (Growth assay of ste13 deletion strain)**

JY001 *h- wild type*  
 SW147 *h- ste13Δ::kanMX6*

**Figure EV4C, EV5B (Untagged mad1 mRNA numbers by smFISH with or without ste13 deletion)**

SW130 *h+ mad2+-ymEGFP*  
 SW193' *h+ mad2-codonOpt-ymEGFP ste13Δ::kanMX6*  
 SW194' *h+ mad3-codonOpt-ymEGFP ste13Δ::kanMX6*  
 SW153' *h+ mad2+-ymEGFP ste13Δ::kanMX6*

**Figure S4A,B (Mad1 protein half-life after codon-optimization)**

SW199 *h? mad1-codonOpt-ymEGFP mad2-codonOpt-ymEGFP mad3-codonOpt-ymEGFP*  
 SW234 *h+ mad1+-ymEGFP mad2+-ymEGFP mad3+-ymEGFP*

**Figure S4C (Test for Mad2-association of codon-optimized Mad1)**

SW206 *h+ mad1+-ymEGFP*  
 SW129' *h+ mad1-codonOpt-ymEGFP*

**Figure S4D,E (Test for kinetochore association and checkpoint function of codon-optimized Mad1)**

SW603 *h- mad1+-ymEGFP plo1+-mCherry<<natR nda3-KM311*  
 SW605 *h- mad1Δ::ymEGFP plo1+-mCherry<<natR nda3-KM311*  
 SW601 *h+ mad1-codonOpt-ymEGFP plo1+-mCherry<<natR nda3-KM311*

**Figure S5A,B (Replacement of mad1 coding sequence with GFP or GFP fusions)**

JY001 *h- wild type*  
 SW642 *h+ mad1+-ymEGFP*  
 SW206 *h+ mad1+-ymEGFP*  
 SW201 *h- mad1Δ::ymEGFP*  
 SW203 *h- mad1Δ::ymEGFP*  
 SW207 *h+ mad1Δ::mad1(66bp)-ymEGFP*  
 SW221 *h+ mad1Δ::mad1(108bp)-ymEGFP*  
 SU200 *h? mad1Δ::nmt1+-ymEGFP*

**Figure S5C,D (Replacement of mad2 and mad3 coding sequences with GFP)**

SW130' *h+ mad2+-ymEGFP*  
 SW139 *h+ mad2Δ::ymEGFP*  
 SW140' *h+ mad2Δ::ymEGFP*  
 SW132 *h+ mad3+-ymEGFP*  
 SU186 *h+ mad3Δ::ymEGFP*  
 SU188 *h+ mad3Δ::ymEGFP*

**Figure S6A (Interaction of Mad1 C-terminal fragments)**

SW623 *h+/h- leu1/leu1 ade6-M210/ade6-M216 ura4+/ura4-D18 mad1+-TEV-Strep2/mad1+-ymEGFP*  
*leu1+<<Pmad3-mad1-430-676-ymEGFP/leu1+<<Pmad3-mad1-430-676-Strep ade6-M216/ade6-M210*  
 SX058 *h+/h- mad1Δ::ura4+/mad1Δ::ura4+*  
*leu1+<<Pmad3-mad1-554-676-ymEGFP/leu1+<<Pmad3-mad1-554-676-Strep ade6-M216/ade6-M210*  
 SX060 *h+/h- mad1Δ::ura4+/mad1Δ::ura4+*

**Table S2 - sgRNA targeting sequences**

| <b>gene</b>     | <b>targeting.sequence</b> |
|-----------------|---------------------------|
| mad1            | GCGCTCTCCGAGATTAGCAT      |
| mad2            | ATTGGGTAGACAGTGACCCT      |
| mad2            | G TTCAGGTGAAGATTTAGAG     |
| mad3            | GCAATTTACTCACCGTTGGT      |
| leu1 intergenic | GTAAGTACACAGCGACAAC       |

**Table S3 - codon-optimized SAC gene sequences**

| gene                  | company   | sequence                                                                                                                                                                                                                                                                                                                                                                                                                                                                                                                                                                                                                                                                                                                                                                                                                                                                                                                                                                                                                                                                                                                                                                                                                                                                                                                                                                                                                                                                                                                                                                                                                                                                                                                                                                                                                                                                                                                                                                                                                                                                                                                                                                                                                                  |
|-----------------------|-----------|-------------------------------------------------------------------------------------------------------------------------------------------------------------------------------------------------------------------------------------------------------------------------------------------------------------------------------------------------------------------------------------------------------------------------------------------------------------------------------------------------------------------------------------------------------------------------------------------------------------------------------------------------------------------------------------------------------------------------------------------------------------------------------------------------------------------------------------------------------------------------------------------------------------------------------------------------------------------------------------------------------------------------------------------------------------------------------------------------------------------------------------------------------------------------------------------------------------------------------------------------------------------------------------------------------------------------------------------------------------------------------------------------------------------------------------------------------------------------------------------------------------------------------------------------------------------------------------------------------------------------------------------------------------------------------------------------------------------------------------------------------------------------------------------------------------------------------------------------------------------------------------------------------------------------------------------------------------------------------------------------------------------------------------------------------------------------------------------------------------------------------------------------------------------------------------------------------------------------------------------|
| <b>mad1-codonOpt</b>  | Genscript | ATGGCGGATTCTCCTAGAGATCCITTCACATCACGTTCAACAATTACCTAGATTTTTAGCAACATCAGTTAAGAAACCAAC<br>CTTAAGAAACCTTCTGTTAACTCTGCTAAIGGTATGTGAAACTTATATTTGACGTTTGTATGATCTGACACCCCTGTAG<br>AAACTAAAAATCCTAAGCTTCTCTTCTTGAATTTCAATTTGAAAATCTTAAAAATGATCTTAAGCGTAAGGAACCTTGAAT<br>TTGAACGTGAACAAATGAACCTTCAACGTAATTTGGCTGAAGAACATGAACAAAAGAAATTTGCAACTTCGTCTTACT<br>TTGGTTGAAAAGCAACTGAAGAACAATCTACTTCTTATCAAAAAGGAAATGAAGAAGTTGCTAATGAAAAAGAGCTA<br>CTCAAGTTAAGATTATGAACTTCTTGTGCTAAGTGGAAAGGAAATGCTGAATTTGAAGACTCAAATGAAAAAGAAATGA<br>TCAAGCTCTTTCTGAAAAGAAATCATGAAGTTATGGTTCTAACCAAGCTTTGCAAATGAAGGATACTAATCTTACTAATTT<br>GGAAAAGCTTTTTGCTGATTCTCGTGAAACAATTTGAAAACCTAAGTGAAGGAATAGCTGCTGCTGAAACAACAACCTCAA<br>GAATTTGCTGTTCAATCAACAACCTGAAAGAATCTATTAACAAGTTTCTTCTTCTTGAATTTGAAAAGAAATTAATGCT<br>GAACAACGCTTCTCAAATTTCTGAACTTGAAGGCTTAAAGCTGCTCAAGAAGAACGATTGAAAAGCTTTCTTCTAACAA<br>CCGTAATGTTGAAATTTCTTAAAGAAAGAAAAGAAATGATCTTGAATCTAAGCTTTACCGTTTTGAAAGAAATCCGTGATAAGG<br>TTGCTACTCTTGAACCTGAAAACGAAAAGATTCAAACCTGAACTTAACCTTTGAAAATCTTTGATTACTAATGAATTACCTA<br>CTCCTGAAGCTGTTTCTAATAAGTTGGTTTTCTTCAAAACACTAATGCTAATCTTGGTGAACGTTTCTTCTTTGGAAAT<br>CTCAACTTTCTAATAAGCCTGCTAATCAACCTCTTGGTGCTAATGAAAAGATGCTGCTCATATTACTGAATTTGAAAAT<br>AAGCTTAAGGAATGCTGAACAACAATCGTCGTTTACAACGCTCAAAAATCTCTTGTCTCAAGAAATTTGAACTTTCTCG<br>TGAAAATTTGAAGCTTACGATGATGAAGAAGCTATTCTTTCTGAAAAGAACTACTGATATGAAGAAGCTTGAACGTAATG<br>AAGGTTAGTTAAGCTTGTGATGAATACAGTTGAAATTAGAATCTATGCCTGTTCTCTTGAATTTGATGAAAACCTCTG<br>ATGAAGTTCTTTGCAAAAACGTCGTCGTAATAAGCAATGAACATAAGGATGCTGGTTACGTTACTGAACCTTTATCGTAAAAA<br>CAACATCTTTTGTTCAAAGTTAAAGAAAAGCAACTTGAAGCTTTTCTCGAGAACAATTTACTTAACTTTGAAATCTTCT<br>ATTGCTACTCTTGGTCAAGAAATGGCTCAAGTTACTGAAATTAATCTTGTCTGTTCTTCAACATCGTTCTAACCCCTACT<br>CTTAAGTACGAACGTTAAAGCTGCTCAATTTGAAAATGCTTAAACGCTGAAAACCTGCTCTTAAAGGCTCTTCTTGAAGA<br>TAAGAAGGTTGATTGCTTCTTCAATCTTTTAAATTTGCTGAACGTAAGCTCTTGTATCTTAAAGAAAGAAATTTGCTGA<br>ACGTGAAAACGTTTCAACGCTTAAAGGAAATTTTCTGTTAAGTCTTTGAAATTTCTGTAAGCTGTTTCTCTCTTTTT<br>GGTTACAAGTTGGATTTTATGCTTAAACGTTCTGTTCTGTTACTTCTACTTCTGCTGAAGATAAACACTGCTTTTATT<br>TTTGTGTTGAACTTCTACTATGAAATTTGGTTGGTAATCTTCTGCTGAAATTTGAACGTTAAATCGTTTTTGGTGT<br>GATGAACGTAACAACTTCTGATGCTTCTGCTACTTCTGAACTTCTGAACTTCTGATAAAAATGAT |
| <b>mad1-codonOpt2</b> | IDT       | ATGGCAGACTCTCCTCGCGACCCCTTTCAATCCAGATCACAATTACCCAGATTCCTTGAACCTAGTGTAAAGAAACCTAA<br>TCTTAAAAACCCCTCAGTTAATCTGCTAATGGTATGTGAAACTTATATTTGACGTTTGTATGATCTGACACCCCTGTA<br>GAAACAAAAATCCTAAATAGCATCACTTGAAGTTTCAAGTTGAAAACCTTAAAAATGATTTGAAGCGCAAGGAACCTTG<br>AGTTTGAACGTGAGCAGATTGAGTTGCAACGCAAAATGGCAGAGAAGAACACGAGCAAAAAATTCATTGCAAGTTAAGAT<br>TGACCTTAGTGAAGCAATTTGAAGAGCAATCAACATCTTATCAAAAAGGAGATCGAGGAAGGAAAACGAGAA<br>GAAGCTACTCAAGTAAAGATTACAGGTTACTTGTATGCCAAATGAAAAGAAATGCTGAGTTAAAAACCCAAATAGAAA<br>AGAATGATCAGGCACCTTTCCGAAAAAATCAGGAGTAAATGGTATCCAATCAAGCCTTGCAGATGAAGGATACGAATCT<br>TACAAACTTAGAAAAGTTATTTGCTGATTCTCGCGAGCAGTTAGAGACCAATGTAAGAGTTAGCTGCTGCCGAGCAA<br>CAATTAAGGAATATCTGTACATAACCAAAATTTGAAAGAGTCTATCAAAACAGGATCTTCTTCCATCGAATTTGGAGAA<br>AATTAATGCTGAGCAACGATTACAGATCTCAGAGTTAGAGAACTTAAAGCAGCACAAGAAGAGCGAATTTGAGAAGCT<br>TTCATCAAAACAATCGCAACGTAAGATTTTGAAGGAGGAGAAAAACGATTTAGAGATGAAGTTGACCGATTTGAAAGA<br>GTATCGAGATAAGGTAGCTACTTTGAAATTTGGAACGAGAAAATCCAGCAGAGTTGAATAGTTGAAAAGTCTTAT<br>AACTAACGAGTTGCCCACTCCCGAAGCTGTCAGTAATAAGCTTTGATTCTTGCAGAAATCCCAACGCAAAATTTGGAGAG<br>CGAGTATCCTCTTTAGAGTACAGTTGCAATAAAGCCTGCCAACCAACCCCTTTGGTGCCAATGAAAAGGACGCTGCC<br>ACATCACCGAGTTGAAAACAAAGCTTAAAGGAAATACACGAGCAAAAACAGACGCTTCAACGACAAAAGAGTTTGGCTA<br>CTCAGGAGATTGACTTGTGAGAGAAAATTTAAATCATATGATGATGAAGAGGCAACTTCTTCAAGAAAATTAACCGA<br>TATGAAAATTTGAACGATCGAAGGCTTAGTAAAACCTTGTAGATGAGTACAAATTTGAAGCTTGAATCAATGCCCGTCT<br>TCTCTGACGTGGATGAAACTAGTGACGAAGTGTATTACAAAAGCGAAGCAGTAAAACGAAACATAAAGACGCTGGC<br>TATGTGACGAGTTGACCGCAAAAACCAACCTTGTGTTTCCAGTGAAGAGAGCAAAATATAGAAGCTTCTTAC<br>GAGAACAAATCAATCAGTTGAAATCCTCAATCGTACATTAAGACAGGAGCTTCTCAGGATTAACGAAATTTGAGT<br>TCGCGTCTTCAAGCATCGTTCCAATCCCACTTTGAAGTACGAAAAGAAATAAAGGCTGCACAACCTTGAATGTTGAAACGCA<br>GAAAACAGTGTCTTAAGGCTTGTGAGGATAAAGAAAGTGGACTGTCTTCCATCCAGAGTTTAAAGATAGCTGAAA<br>GAAAAGCATTGGATTTGAAAAGGAAAGTTGCAGAGAGAGAAAACGCAATTCAGCGTTTAAAGGAGATCTTTTCAAGTCA<br>AATCCTTAGAGTTCCGTGAGGCTGCTTTTCAATTTTGAATATAAGTTGCACTTCAACGCTTCAACGAAAGTGTGCGTGA<br>ACTTCCACGTAATCTCGAGAGGACAATACCGCTTTTATATTCGATGGAGAGTCAACCATGAAGTTGGTGGGTAACC<br>CATCTGGACCAAGAAATTCGAGCGATTGATACGATTCTGGTGTGATGAGAGAAAACCAATCTCGGATGTTAGCCGCTT<br>GACCTTGAGTTATTAGATAAAAATGAC      |
| <b>mad2-codonOpt</b>  | Genscript | ATGCTCTTCTGTTCTTCTGTTACTAATCTTCTTAAAGGTTCTTCTAACTTGTCTGAAATTTTTGTTGTTTGTAAATGTT<br>TCAAATATGCCATGCTAACTTAATGAAGAATACGCTGTTAACTCTATTTTGTTCAAACGTTGATCTATCTCTGCTGAAGAT<br>TTTTAAGGTTGTTGTAAGTACGGTTTAAACATGCTTGTCTGTTGATGAAGAAGTTAAACTTATATTCGTAAAATTTGTT<br>TCTCAATACACAGTGAAGTTGTTCTATTACACTTTTGAATTAACAATTTTTAGAAATGGATGTTTGTAAAGAAAAT<br>CAAAAGCTTATTCTTGTATTACTTCTAAGTGTCTGTTGAAGATTTGAAACGTTGGCAATTCATGTTGAAATGGTTGAT<br>ACTGCTGATCAATTTCAAACATTTGTAATAAGGAAGATGAACCTCGTGTTCAAAAGGAAATTTCAAGCTTATTCTGCTCA<br>AATTAAGTCTACTGTTACTTTTCTTCACTTGAAGAACAATGACTTTTAAATGTTTATGTTTATGCTGATAAAGATTCT<br>GAAGTTCTACTGATTTGGTTGATTCTGATCCTCGTATTTCTGCTGATGCTGAACAAGTTCAATTTGCGTTCTTTTCTACT<br>TCTATGCATAAAGATTGATGAAGTTGCTTACTGTTAATCTCT                                                                                                                                                                                                                                                                                                                                                                                                                                                                                                                                                                                                                                                                                                                                                                                                                                                                                                                                                                                                                                                                                                                                                                                                                                                                                                                                                                                                                                                                                                         |
| <b>mad3-codonOpt</b>  | IDT       | ATGGAACCACTGATGACAGTAAAAACTGGGTTCAATGGATGTTATTGAACAATCAAGGAAAACATTGAACCACGAA<br>AGGCAGGTCATTCTGCTTCTGCTTTGGCTAAGTCTTCTCTCGTAACCATACTGAAAAGAAAGTTGCTGGTTTACAAAA<br>GAACGATAGGGTCATGAGCGTAAGATTGAAACTTCTGAATCTCTTGTATGATCCTTTGCAAGTTTGGATTGATTACATTA<br>GTGGACTCTTGATAACTTCTCAAGGTGAACTAAGACTCTGGTTTGGTTACTTTTGGTAACTGTTGACTCTGCTGAAAT<br>TGTTGTAACCCCTTTGTAAGGATGATGTTCTGTTATCTTCTGATTTTGGATGCAATACGTTAACTACATTGATGAACCTGT<br>TGAATTTTTCTTTTCTGCTCATCATATAATTTGGTCAAGAAATCTTCTATTTTCTATGAAGAATACGCTAACTACTTTGAAT<br>CTCGTGGTTATTTCAAAGGCTGATGAAGTTTACAAAAGGTTAAACGTAAGAAGGCTAAGCCTTTTCTGTTTCTCAA<br>CAAAAAGTACCAACAATTCACATCACTGTTGGTTGAAATTTGCTCTCAATCTTTTCTTCAACACTAACTCTGTTAAACCTC<br>TTCAAACCTACTTTGAACTACTAATCAATTTCAAGAAATTTCTCAATCTGCTACTAAGATTTCAAGCCTAAGTTTAAATTTT<br>TGTTTATCTGATGCTGATGTTTCTGGTAAAGATGTTCAACCTGGTACTTGGCAAACTTTGGGACTGTTGATCAACGCT<br>GTAAGGAAAACAACATTTCTGCTACTTCTGGTTGGTGAATAATGCTTTAAATCTCCTCGTAAGTTAGATCCATTG<br>GGAAAGTTCAAGTTCAATTCGATGAAGAAGTTTCAAGGAA                                                                                                                                                                                                                                                                                                                                                                                                                                                                                                                                                                                                                                                                                                                                                                                                                                                                                                                                                                                                                                                                                                                                                                                                                                                   |

**Table S4 - FISH probes**

**mad2**

cgttccttatgggaacgctag  
gtttggaagaacctttcagt  
aaaggattgagttcaccgca  
gtcttctgctgggtaaattc  
tccatatttccgaacaactt  
tcacttacctgacaagcat  
tcgaatgtaagtcttgacct  
ttgcaaacatccatttgtgt  
cgctctaaatcttcacctga  
catctccacattaactgcc  
gaaatgatcagctgtgtca  
atcttctttgttgccaatgt  
tttctttttgactcgcagt  
ttagcagtgatttgacgaa  
ctagttgaggcaaaaaggtc  
acgttaaactgacctgttc  
gtctttatcagcgtatacca  
cccaatctgttggaaacttcg  
aaaatccagggtcactgtc  
ttgaacttgttcagcatctc  
atthtgtcatactcgtact  
ggattcactcगतatgcaac

**ymEGFP**

cagtgaaataattcttcacctt  
tcaaccaaattgggacaaca  
gaccattaacatcaccatcta  
ccttcaccggagacagaaaaat  
gtcaatttaccgtaagtagca  
atggaactggcaatttaccag  
aaagtagtgactaagggtggc  
tggtgtttcatatgatctggg  
ctggcatggcagacttgaaaa  
gttctttcttgaacataacct  
agttaccgtcatctttgaaaa  
ttgacttcagctctggtcttg  
taactaaggatcaccttcaa  
ataccttttaattcgattcta  
cctaaaatgttaccatcttct  
gagagttatagttgtattcca  
gtcagccatgatgtaaacatt  
actttgataccattcttttgt  
gttggtcttaatttgaagtt  
attgaacagaaccatcttcaa  
ttttgtgataatggtcagct  
agactggaccatcaccaattg  
aagtaatggttgtctggtaac  
ggataaacgagattgagtgga  
ctctcttttcgtttggatctt  
aattctaacaagaccatgtgg  
ggtaataaccagcagcagtaac  
ttgtacaattcatccatacca

**mad1**

gaacggatccctaggagaatc  
aatctaggcaactgtgaacgc  
atttggtttcttaacgcttgt  
gcagaattaacagaaggcttc  
agctagtttgggatttttgt  
ccttccgctttaaatcatttt  
actcaatttgttcacgctcaa  
ttcttctgcaagttttctttg  
gctgtaacgaattcttctgtt  
agttgcttttcaactagagtt  
gataagaagtagactgctcct  
ccttttcaatttcttacttctt  
ttgcatcaagtagttcatgga  
ttcaactctgcaatctctttc  
gatcattcttttctatctggg  
acttcatgattcttttcaactt  
tgcaaagcttgatttgagacc  
gtttgtaagattggatcctt  
ggaaatccgcaaagagttttt  
ttccttacacttcgtttcaag  
gaaagctcttgaattgctgc  
tcttccaattgctgattatga  
aactagaacctgcttgatgg  
gcatttatttttccagttca  
cgctaatttgaagacgttgct  
cgcagcttttaatttttccaa  
gatagcttttcaattcgttct  
ccttgagaatttcaacattcc  
ttggactccaaatcgttttt  
aaccttatccctatatcttct  
tcattttcaggttcaagggtta  
gggttggttaactcgttagtaa  
acgagttgtttgaaacagct  
ttagcattggattctgtaga  
taaactagaacgcgctctcc

**Table S5 - qPCR primers**

| <b>Target</b> | <b>Forward</b>          | <b>Reverse</b>          |
|---------------|-------------------------|-------------------------|
| act1          | CCAAATCCAACCGTGAGAAGA   | GTACGACCAGAGGCATACAAAG  |
| cdc2          | GGTATCGTGCTCCTGAAGTATTG | CAGAGTCACCGGGAAATAATGG  |
| ecm33         | ATCATTCGCTCTCACTCTTCTTT | GTACCTTGGGCGGAGATATTG   |
| mad1          | CCTAATGGGAGTGTTTCGTGTTA | CCTGATGGATTACCAACCAATTC |
| mad2          | TTAGAGCGGTGGCAGTTTAAT   | CTCGCAGTTCATCTTCTTTGTTG |
| mad3          | CGGATGGTTCTGGAAAGGAT    | CTACCCAAGAAGTAGCCGATATG |
| S.c. ACT1     | TGGATTCCGGTGATGGTGTT    | TCAAAATGGCGTGAGGTAGAGA  |
| ymEGFP        | TGAAGGTGAAGGTGATGCTAC   | CTAAGGTTGGCCATGGAAC     |

Chan et al. 2018
